# Supplementary material
Source: MDPI journal article supplement (https://www.mdpi.com/2304-6740/11/12/459)
Supplement: s1 [file s1]

Gulino et al. - Combined effect of halogenation and SiO<sub>2</sub> nanoparticles addition on the Li-ion conductivity of LiBH<sub>4</sub>

**Combined Effect of Halogenation and SiO<sub>2</sub> Addition on the Li-Ion Conductivity of LiBH<sub>4</sub>**

Valerio Gulino <sup>1,2,\*</sup>, Laura de Kort <sup>2</sup>, Peter Ngene <sup>2</sup>, Petra de Jongh <sup>2</sup> and Marcello Baricco <sup>1,\*</sup>

1 Department of Chemistry, NIS-INSTM, University of Turin, Via Pietro Giuria 7, 10125 Torino, Italy

2 Materials Chemistry and Catalysis, Debye Institute for Nanomaterials Science, Utrecht University, Universiteitsweg 99, 3584 CG Utrecht, The Netherlands; l.m.dekort@uu.nl (L.d.K.); p.ngene@uu.nl (P.N.); p.p.e.dejongh@uu.nl (P.d.J.)

\* Correspondence: v.gulino@uu.nl (V.G.); marcello.baricco@unito.it (M.B.)

## Supporting Information

Figure S1: IR–ATR spectrum of  $h\text{-Li}(\text{BH}_4)_{1-\alpha}(\text{X})_\alpha$  SSs and pure LiBH<sub>4</sub>

Figure S2: Density of  $h\text{-Li}(\text{BH}_4)_{1-\alpha}(\text{X})_\alpha$  SSs as a function of halide concentration

Figure S3: PXD patterns of  $h\text{-Li}(\text{BH}_4)_{1-\alpha}(\text{X})_\alpha$  SSs with different  $v/v$  % of SiO<sub>2</sub>

Figure S4: IR–ATR spectrum of  $h\text{-Li}(\text{BH}_4)_{1-\alpha}(\text{X})_\alpha$  SSs with different  $v/v$  % of SiO<sub>2</sub>

## IR-ATR spectrum of $h\text{-Li}(\text{BH}_4)_{1-\alpha}(\text{X})_\alpha$ SSs and pure LiBH<sub>4</sub>

The infrared spectra were collected in Attenuated Total Reflection mode with a Bruker Alpha-P spectrometer, equipped with a diamond crystal. The instrument was placed inside a nitrogen filled glovebox. All the spectra were recorded in the 5000–400 cm<sup>-1</sup> range with a resolution of 2 cm<sup>-1</sup>, average of 50 scans.

Results obtained for  $h\text{-Li}(\text{BH}_4)_{1-\alpha}(\text{X})_\alpha$  (X = I, Br) solid solutions are reported in **Figure S1a** and **Figure S1b**, together with the spectrum for pure orthorhombic LiBH<sub>4</sub>. The IR-ATR spectrum of LiBH<sub>4</sub> shows two main sets of absorption bands. The bands in the 2400–2000 cm<sup>-1</sup> region are due to stretching of the B-H bonds, while the bands in the 1600–800 cm<sup>-1</sup> region are related to the B-H bending vibration modes.<sup>10,40,42</sup> The stabilization of the hexagonal phase of the LiBH<sub>4</sub> through the incorporation of either I- or Br- leads to a change in the spectra.<sup>10,12</sup> Furthermore, the IR spectra in the low frequency region (1500–600 cm<sup>-1</sup>) become more complex, reflecting a change in the symmetry of the BH<sub>4</sub> anions. In the low frequency region, **Figure S1a** shows the presence of new peaks at ~1170 cm<sup>-1</sup>, 1020 cm<sup>-1</sup> and 960 cm<sup>-1</sup>, in agreement with results described by Rude et al.<sup>42</sup>. In **Figure S1b**, only the peak at ~1170 cm<sup>-1</sup> can be clearly observed in all spectra.

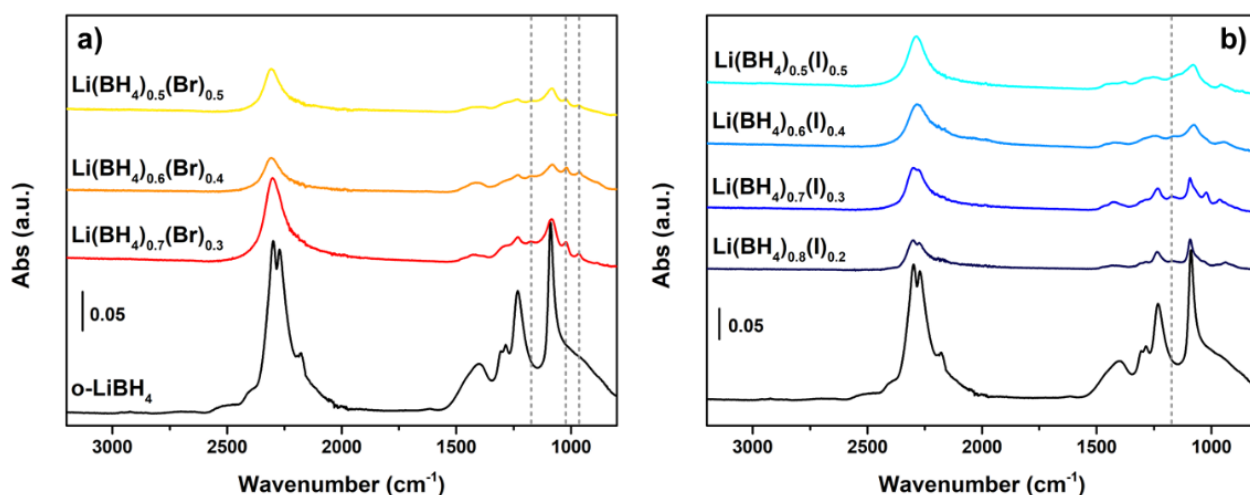

**Figure S1.** IR-ATR spectrum of pure orthorhombic LiBH<sub>4</sub> (bottom) and of a) **Br0.3, Br0.4, Br0.5** samples and b) **I0.2, I0.3, I0.4, I0.5** samples. Grey lines highlight the presence of new absorption bands in the SS samples with respect the orthorhombic LiBH<sub>4</sub>

conductivity of LiBH<sub>4</sub>

### Density of h-Li(BH<sub>4</sub>)<sub>1- $\alpha$</sub> (X) <sub>$\alpha$</sub> SSs as a function of halide concentration

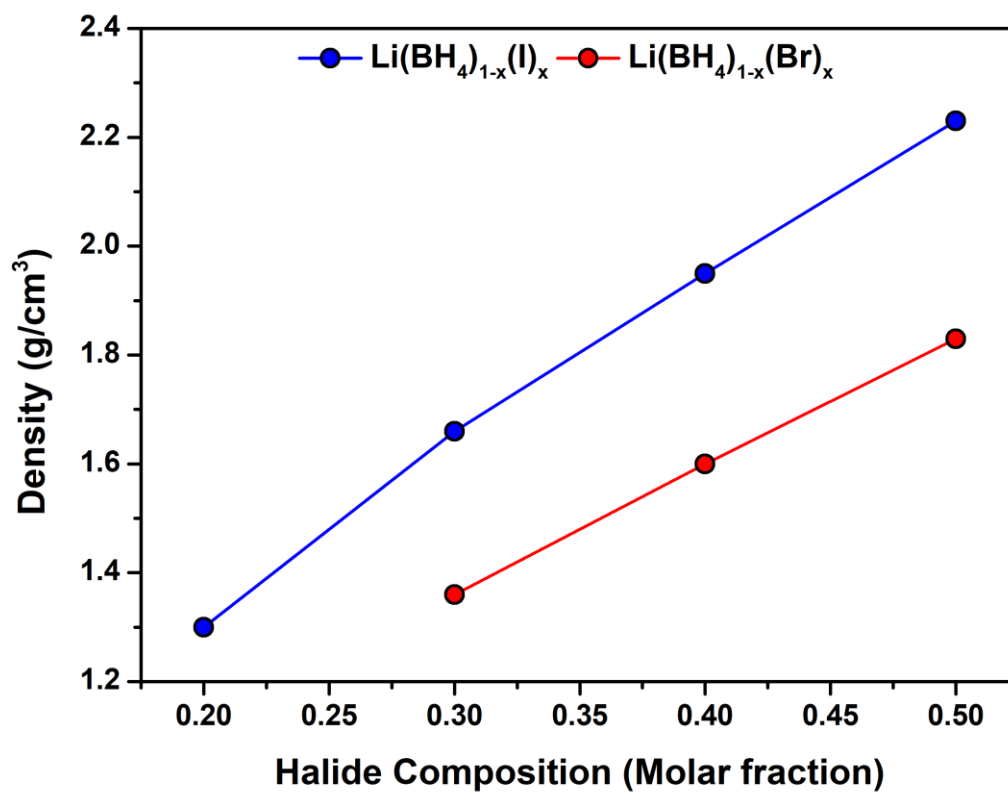

**Figure S2.** Density of h-Li(BH<sub>4</sub>)<sub>1- $\alpha$</sub> (X) <sub>$\alpha$</sub>  SSs as a function of halide composition (molar fraction), calculated from lattice constants of the unit cell, determined from the Rietveld refinement of PXD patterns. Red cycles for h-Li(BH<sub>4</sub>)<sub>1- $\alpha$</sub> (Br) <sub>$\alpha$</sub>  and blue cycles for h-Li(BH<sub>4</sub>)<sub>1- $\alpha$</sub> (I) <sub>$\alpha$</sub> .

**PXD patterns of  $h\text{-Li}(\text{BH}_4)_{1-a}(\text{X})_a$  SSs with different v/v % of SiO<sub>2</sub>**

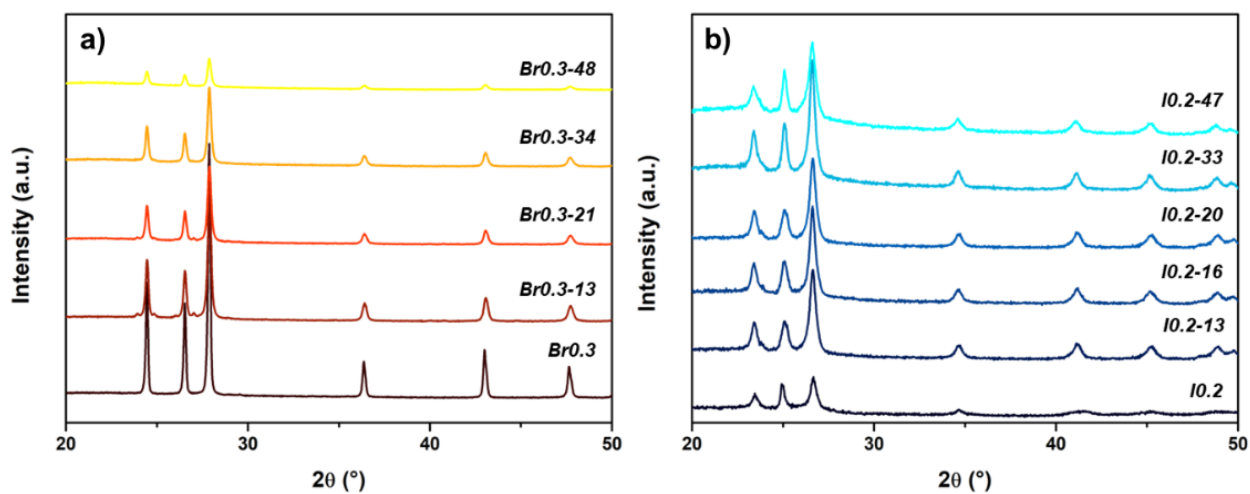

**Figure S3.** PXD patterns of a)  $h\text{-Li}(\text{BH}_4)_{0.7}(\text{Br})_{0.3}$  b)  $h\text{-Li}(\text{BH}_4)_{0.8}(\text{I})_{0.2}$ , with different v/v % of SiO<sub>2</sub> (see Table 1 in the main text).

**IR–ATR spectrum of h-Li(BH<sub>4</sub>)<sub>1- $\alpha$</sub> (X) <sub>$\alpha$</sub>  SSs with different v/v % of SiO<sub>2</sub>**

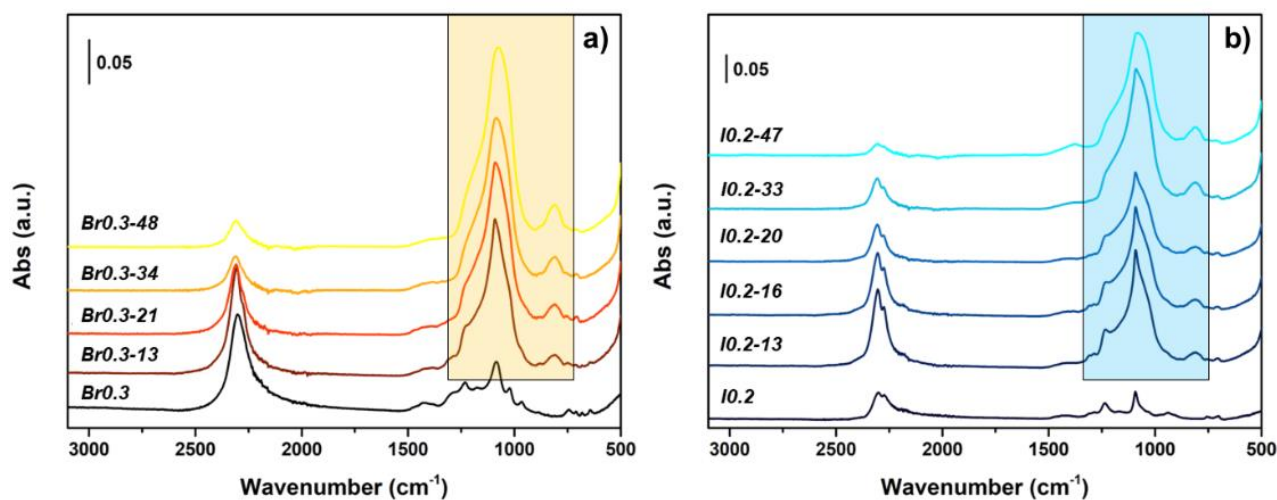

**Figure S4.** IR–ATR spectra of a) *h*-Li(BH<sub>4</sub>)<sub>0.7</sub>(Br)<sub>0.3</sub> and b) *h*-Li(BH<sub>4</sub>)<sub>0.8</sub>(I)<sub>0.2</sub> samples, with different v/v % of SiO<sub>2</sub>. The spectrum of sample **Br0.3** and **I0.2** are also reported (bottom).

The presence of the SiO<sub>2</sub> is clearly highlighted by the intense and broad absorption band in the region 1300–750 cm<sup>-1</sup>.
